# Supplementary figures and images for: Synthesis, characterization, and biological verification of asialoglycoprotein receptor-targeted lipopolysaccharide-encapsulated PLGA nanoparticles for the establishment of a liver fibrosis animal model
Source: Royal Society of Chemistry journal article supplement (doi:10.1039/d3bm01058a), 2023-01-01

## $\alpha$ -SMA (42 kDa protein)

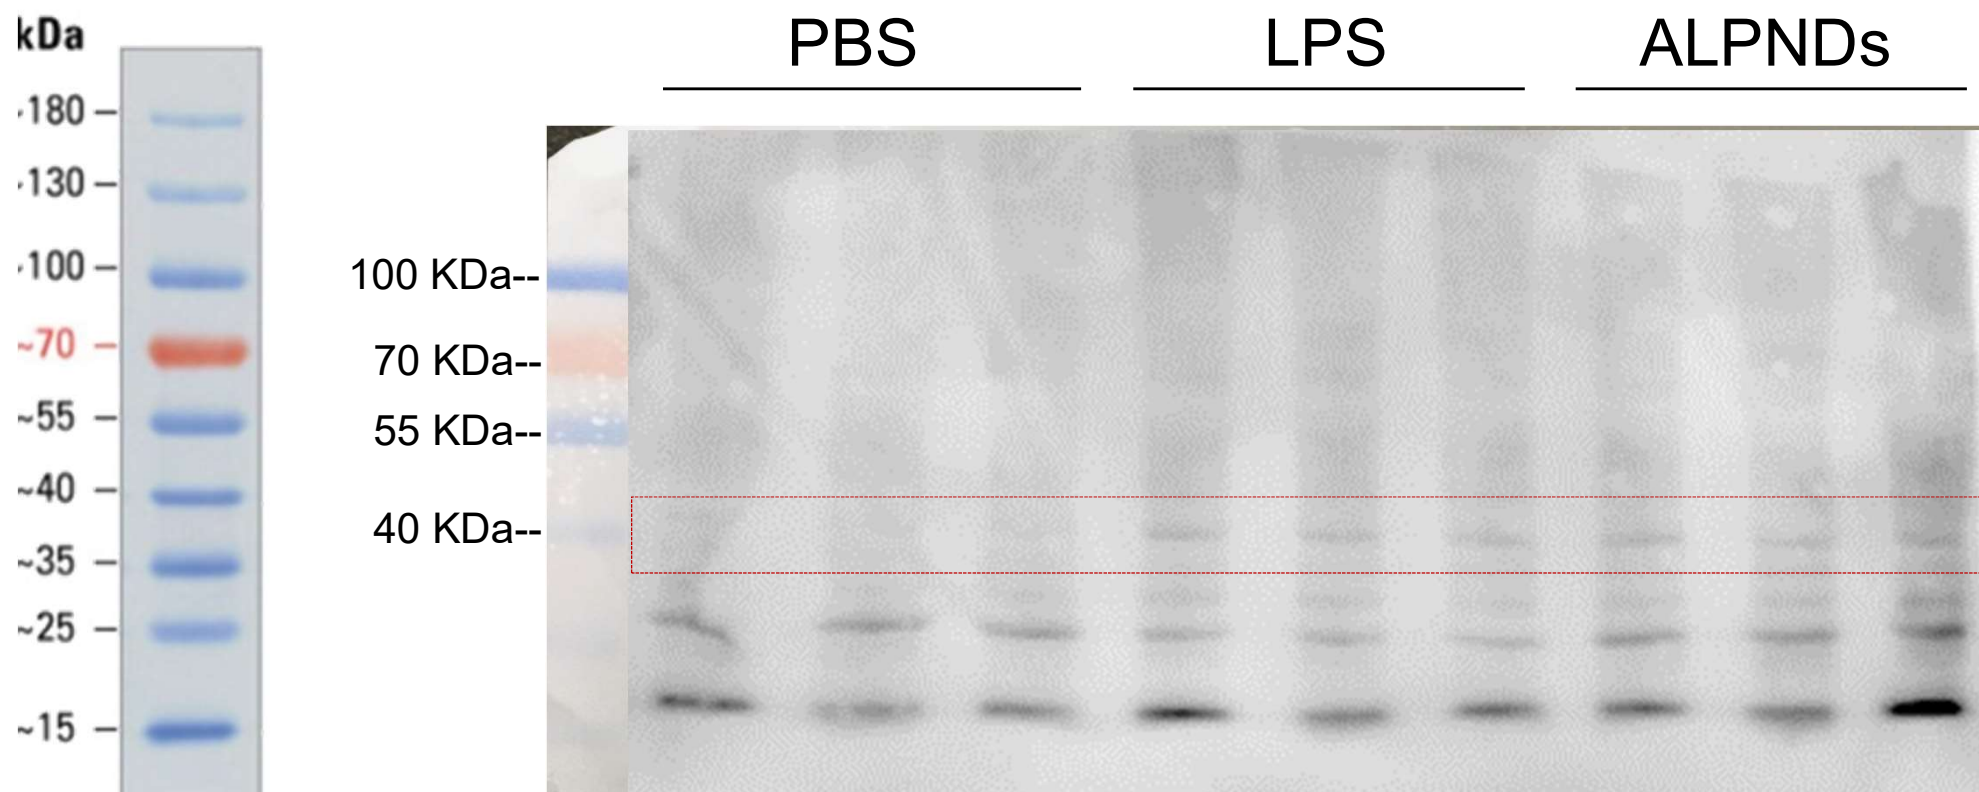

# TNF- $\alpha$ (26 kDa protein)

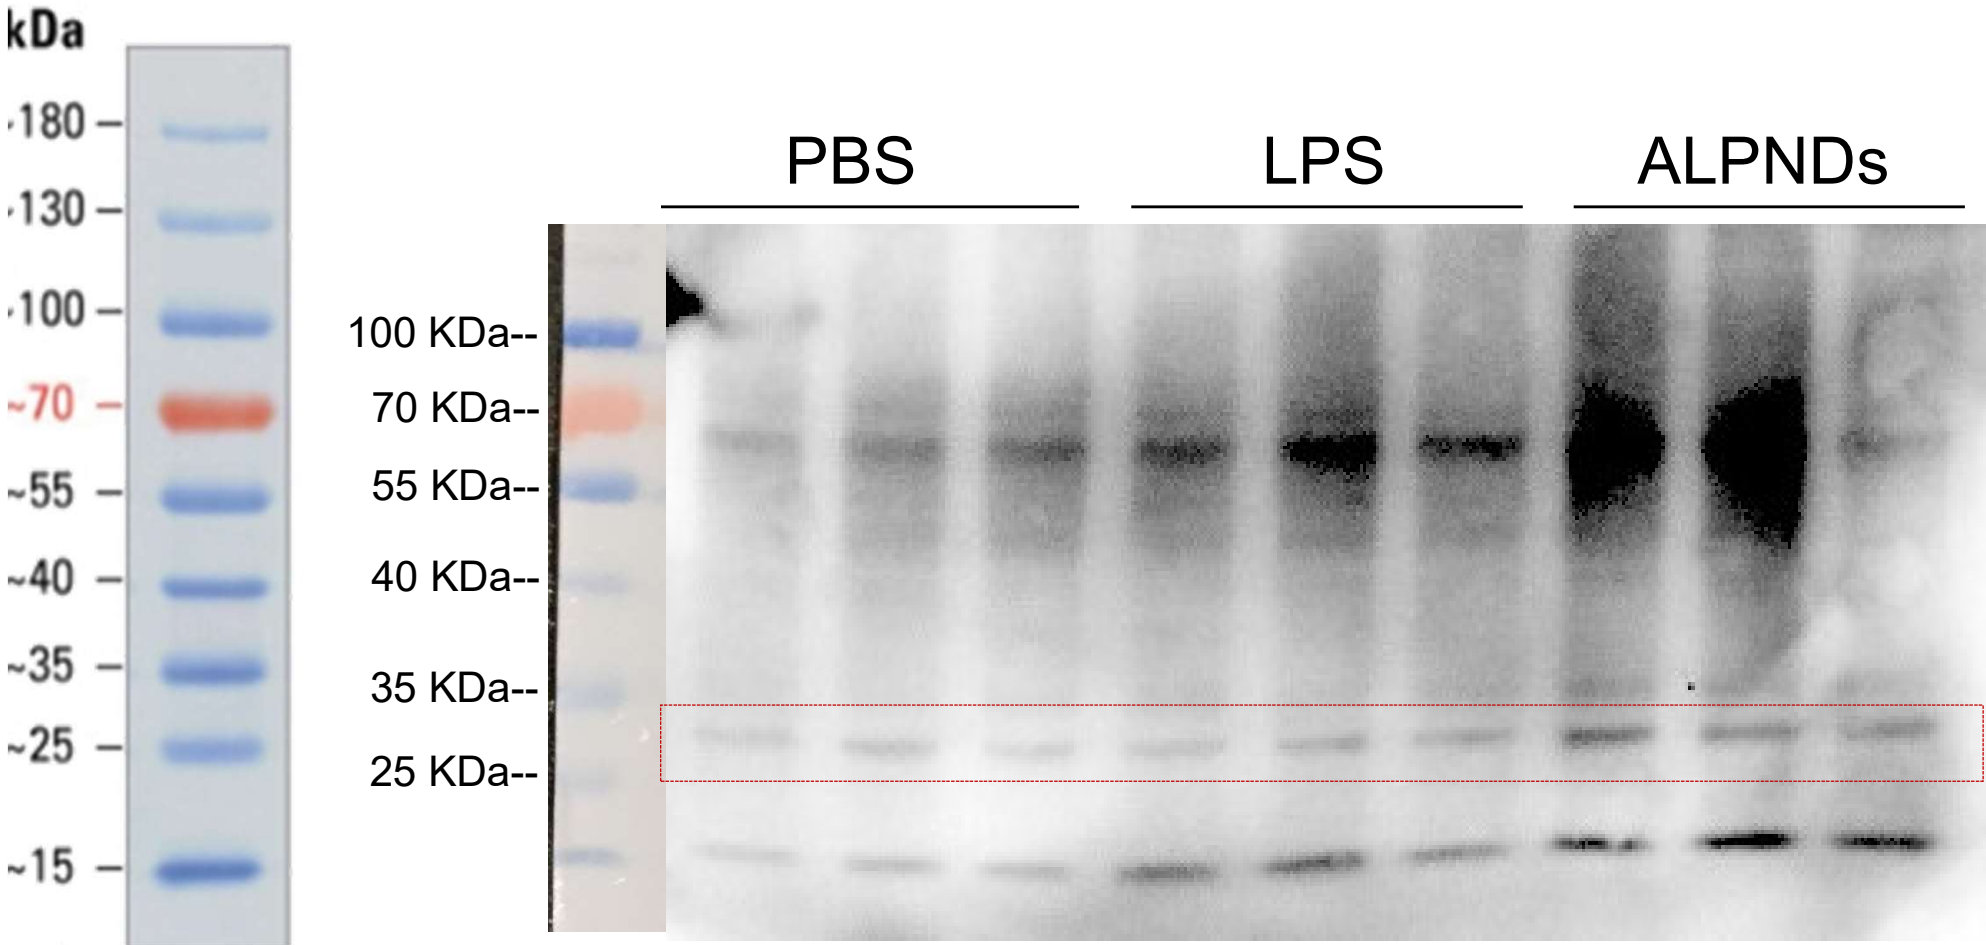

# IL-6 (21-28 kDa protein)

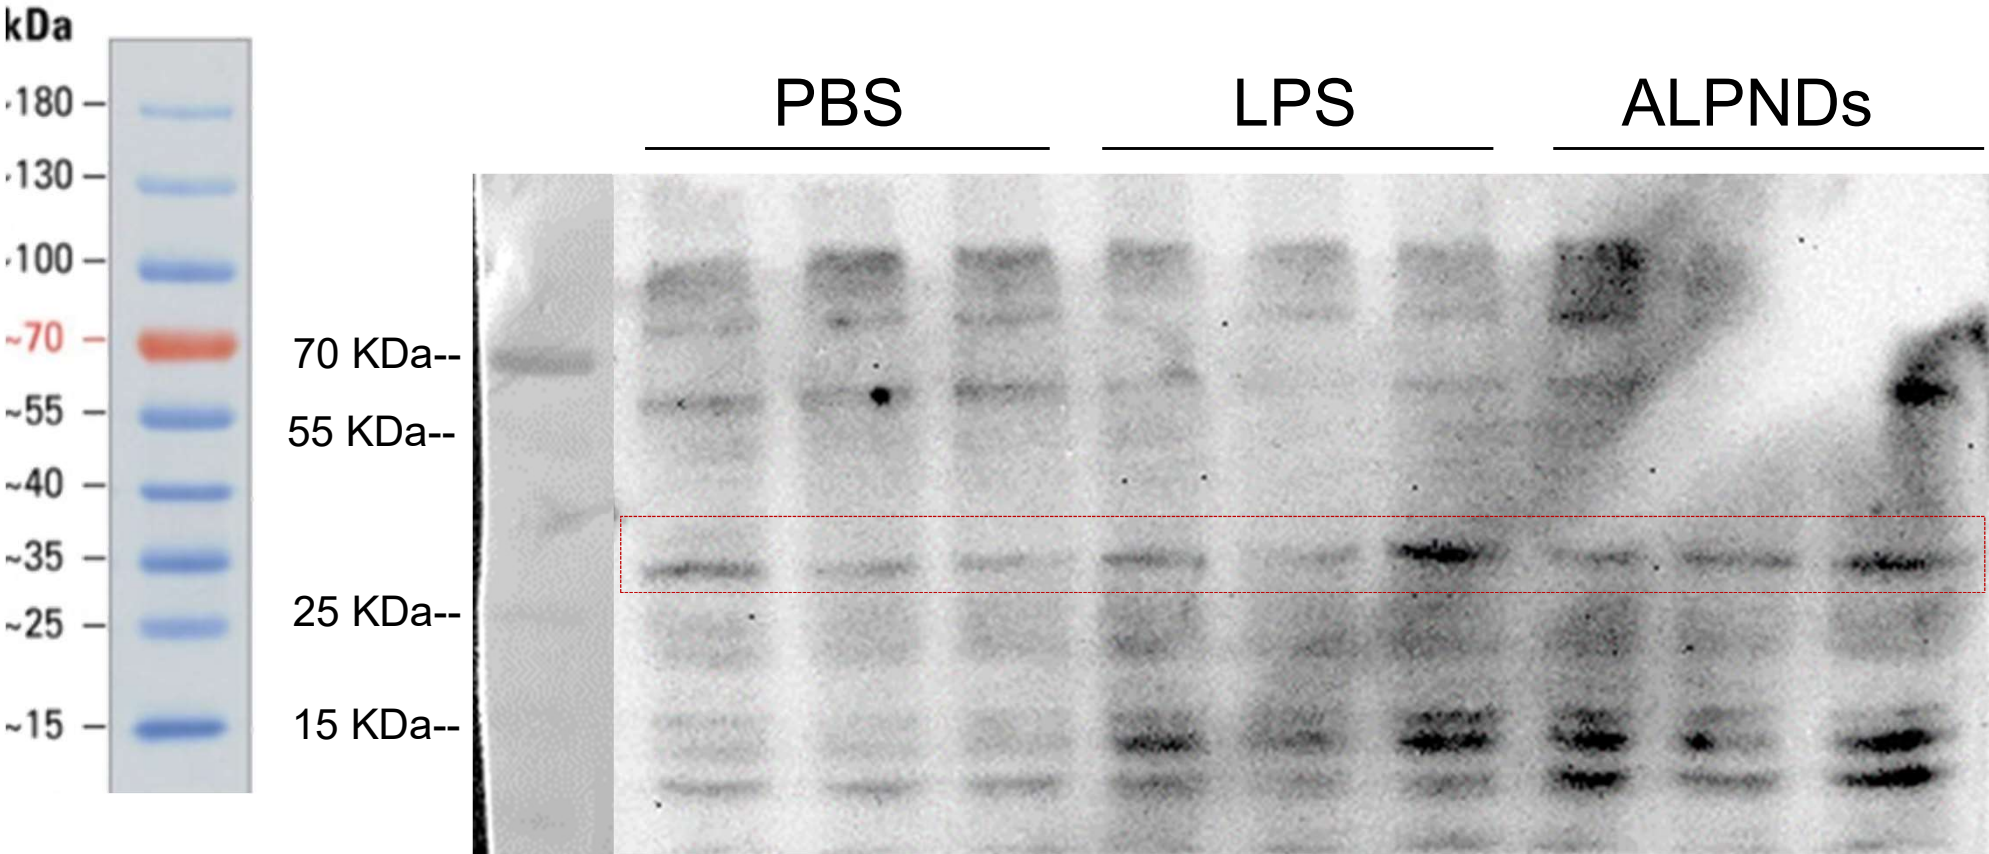

# IL-1 $\beta$ (30-35 kDa protein)

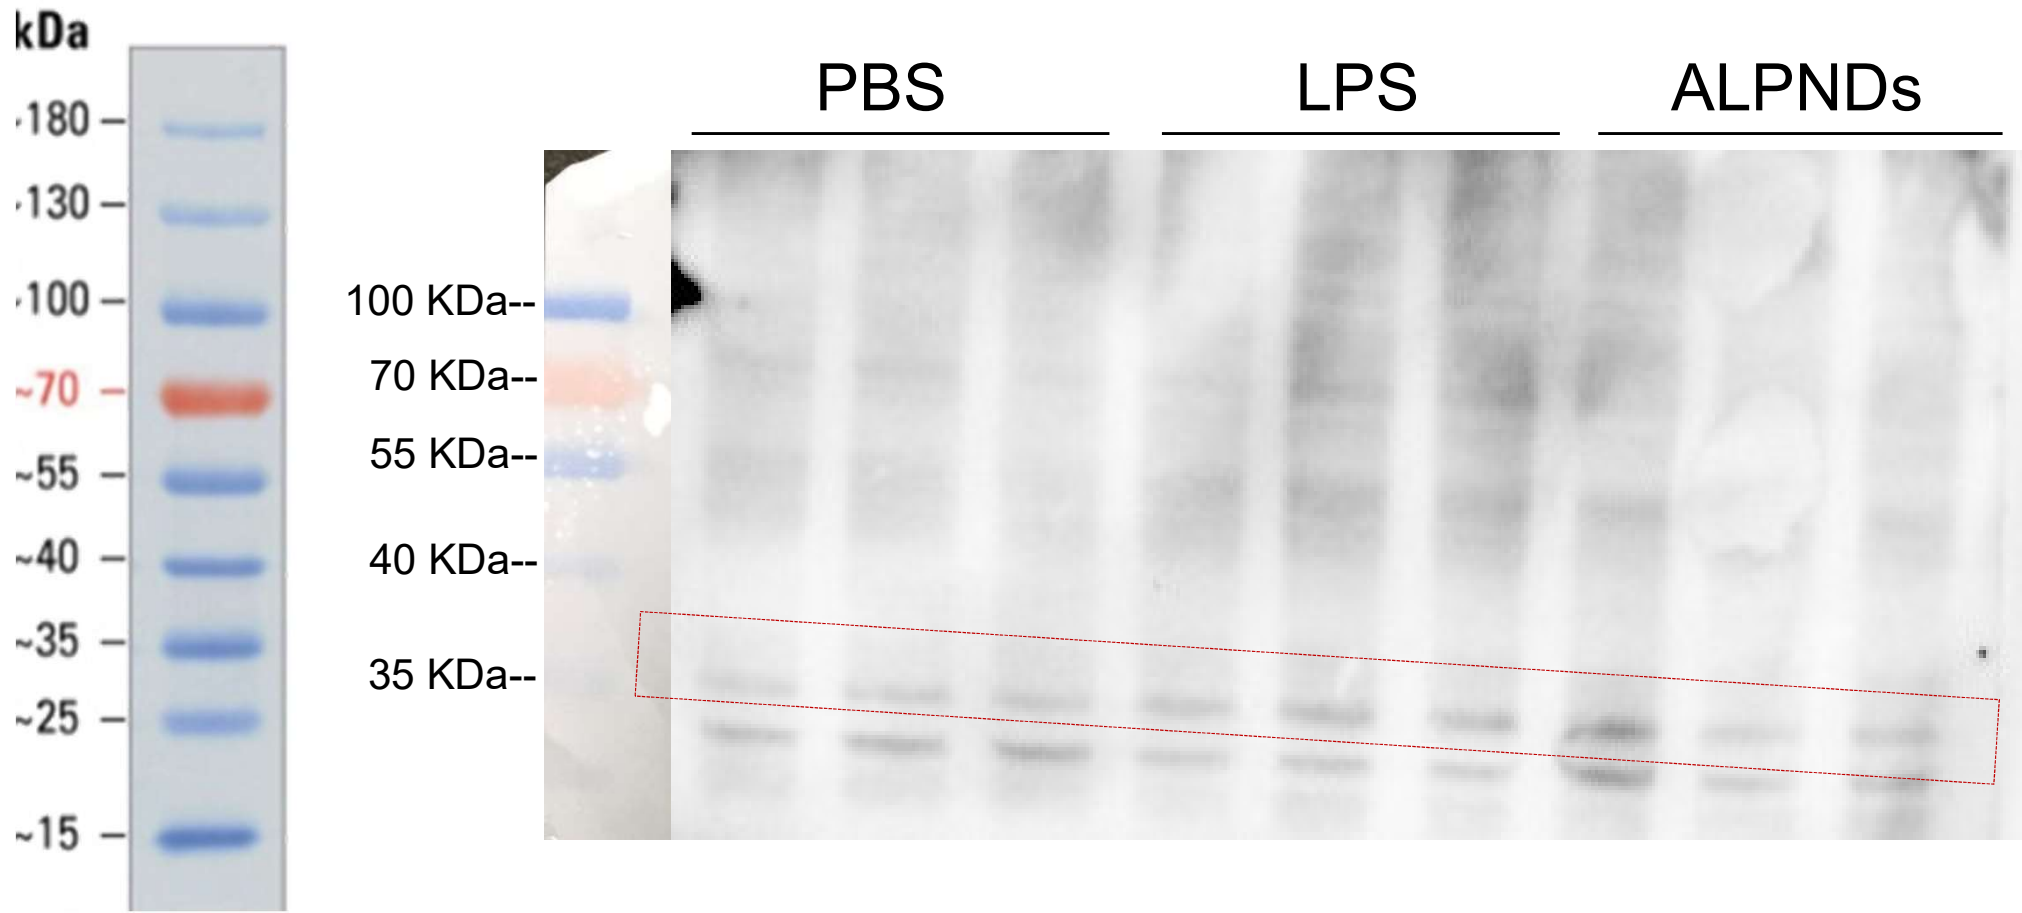

# GAPDH (37 kDa protein)

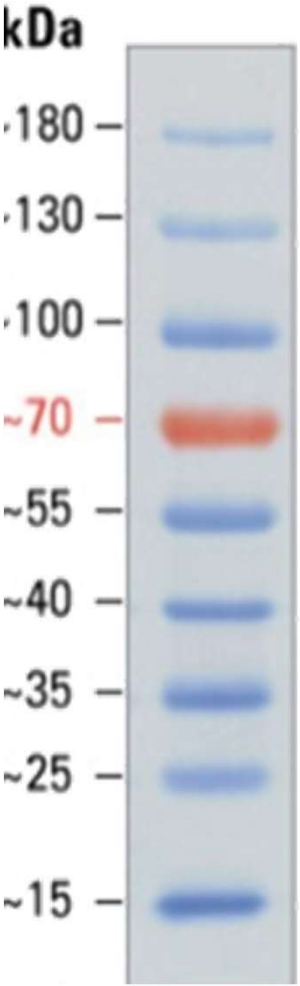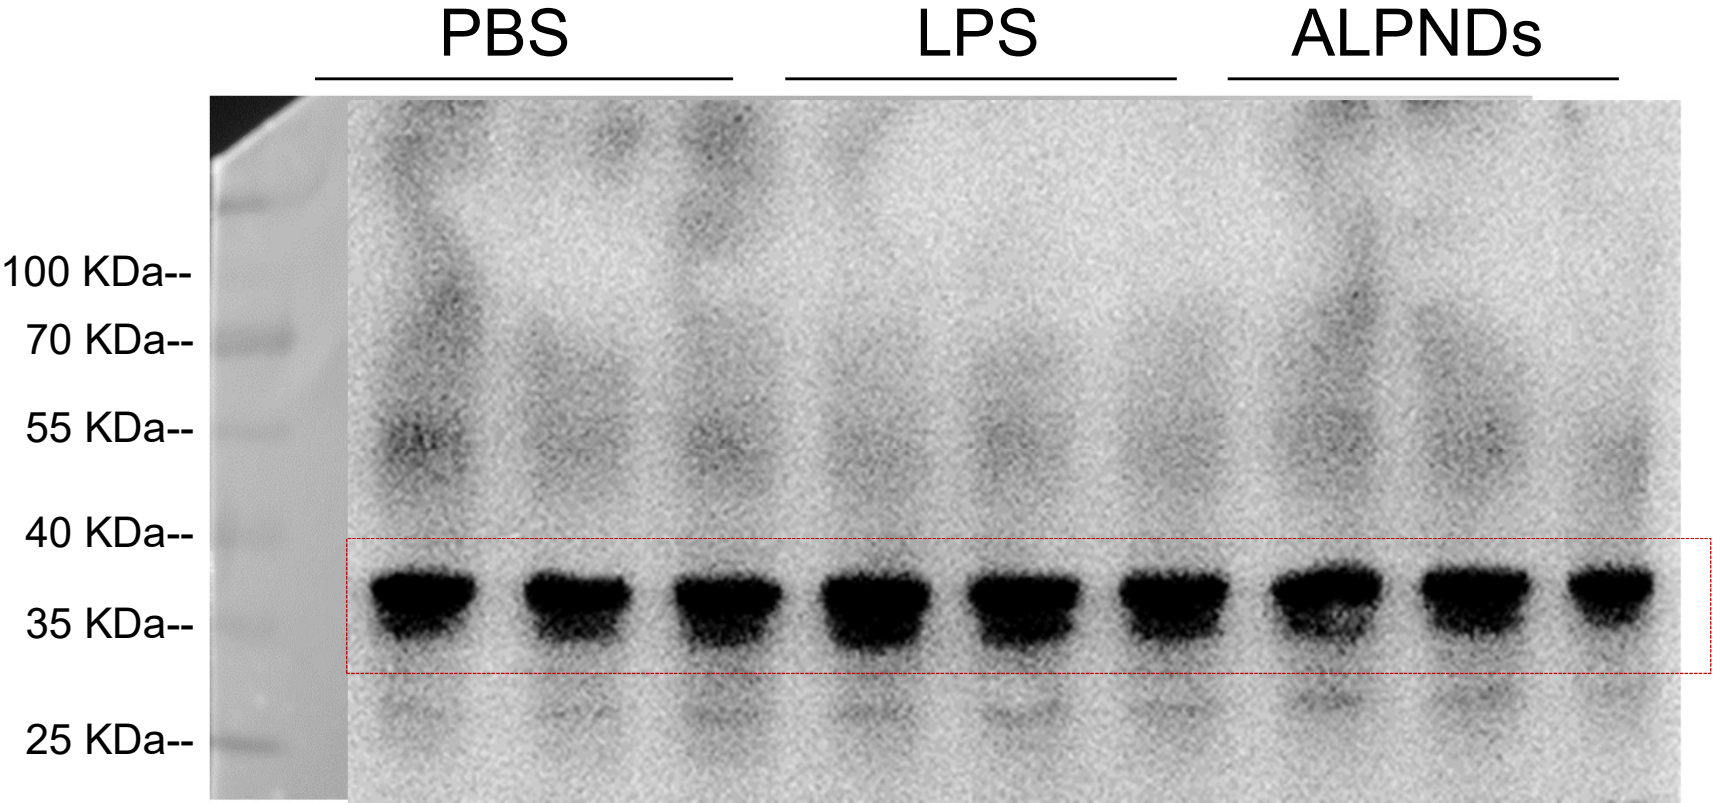

Supplement: d3bm01058a2.pdf [file d3bm01058a2.pdf]
